# Supplementary material for: Identification and Characterization of CYP6 Family Genes from the Oriental Fruit Moth (Grapholita molesta) and Their Responses to Insecticides
Source: MDPI journal article supplement (doi:10.3390/insects13030300), 2022-03-17
Supplement: s1 [file s1]

**Table S1** Quantitative PCR primers

| Primer name                     | Sequence from 5' to 3'                              | Amplification product length |
|---------------------------------|-----------------------------------------------------|------------------------------|
| <i>CYP6B74</i>                  | F: GAGCTAACTTGTTCCACGCC<br>R: CGAAGACACAGGCCGTTATG  | 225                          |
| <i>CYP6AB112</i>                | F: TACCAGCACTCGGAAACCAT<br>R: TCGCTTCCAAGGTGTGATCT  | 214                          |
| <i>CYP6AB113</i>                | F: TTTGGTTTCCTTACACGCCG<br>R: TCATCCTCAGGGTCGAATCG  | 170                          |
| <i>CYP6AB114</i>                | F: TCGGCCGGAGAGATTTAGTC<br>R: ACCCGACTTTGGCTCAACTA  | 206                          |
| <i>CYP6AB115</i>                | F: TTCAGATCAACACGTCCGGA<br>R: AACAAACCGCCACAAATCTCC | 170                          |
| <i>CYP6AB116</i>                | F: GATGACACGTCCACATTCCG<br>R: AAAGCGACCGTATGCCTTTC  | 252                          |
| <i>CYP6AB117</i>                | F: GCTGCTAAACCAACACACGA<br>R: GCGTAGAAAATGTTGGGCCA  | 209                          |
| <i>CYP6AN35</i>                 | F: ACCAGCCCTCATCATCAGAG<br>R: GCAGCTTCCAAGTATCACCG  | 152                          |
| <i><math>\beta</math>-actin</i> | F: CTTTCACCACCACCGCTG<br>R: CGCAAGATTCCATACCCA      | 222                          |

**Table S2** Best BLASTp matches for *G. molesta* P450s

| Gene name        | ORF length | Best BLASTp match        |                  |                                 |         |                  |
|------------------|------------|--------------------------|------------------|---------------------------------|---------|------------------|
|                  |            | Name                     | Accession number | Species                         | E-value | Percent identity |
| <i>CYP6B74</i>   | 1497       | cytochrome P450 6B45     | ADE05578.1       | <i>Manduca sexta</i>            | 0       | 54.92            |
| <i>CYP6AB112</i> | 1593       | cytochrome P450 6B2c     | AXP17138.1       | <i>Cydia pomonella</i>          | 0       | 87.61            |
| <i>CYP6AB113</i> | 1530       | escape protein 2         | AXP17154.1       | <i>Cydia pomonella</i>          | 0       | 75.50            |
| <i>CYP6AB114</i> | 1536       | cytochrome p450 CYP6AB14 | ASO97998.1       | <i>Vanessa tameamea</i>         | 0       | 69.45            |
| <i>CYP6AB115</i> | 1536       | CYP6AB47                 | AHW57301.1       | <i>Chilo suppressalis</i>       | 0       | 69.03            |
| <i>CYP6AB116</i> | 1530       | CYP6AB7                  | ABL60877.1       | <i>Depressaria pastinacella</i> | 0       | 63.53            |
| <i>CYP6AB117</i> | 1551       | Cytochrome P450 6B2b     | AXP17131.1       | <i>Cydia pomonella</i>          | 0       | 80.57            |
| <i>CYP6AN35</i>  | 1533       | Cytochrome P450 CYP6AN19 | ASX93976.1       | <i>Zygaena filipendulae</i>     | 0       | 58.62            |

**Table S3** Physicochemical properties of *G. molesta* P450s

| Gene name                                               | CYP6B74                                                                                  | CYP6AB112                                              | CYP6AB113                                              | CYP6AB114                                              | CYP6AB115                                              | CYP6AB116                                              | CYP6AB117                                              | CYP6AN35                                               |
|---------------------------------------------------------|------------------------------------------------------------------------------------------|--------------------------------------------------------|--------------------------------------------------------|--------------------------------------------------------|--------------------------------------------------------|--------------------------------------------------------|--------------------------------------------------------|--------------------------------------------------------|
| Number of AA                                            | 498                                                                                      | 530                                                    | 509                                                    | 511                                                    | 511                                                    | 509                                                    | 516                                                    | 510                                                    |
| Molecular weight                                        | 58047.2                                                                                  | 60754.95                                               | 58261.07                                               | 58496.04                                               | 58267.78                                               | 57365.67                                               | 59752.42                                               | 58195.37                                               |
| Theoretical pI                                          | 8.84                                                                                     | 8.35                                                   | 6.55                                                   | 8.82                                                   | 8.57                                                   | 8.77                                                   | 7.61                                                   | 8.82                                                   |
| Total number of negatively charged residues (Asp + Glu) | 61                                                                                       | 67                                                     | 63                                                     | 64                                                     | 64                                                     | 54                                                     | 67                                                     | 63                                                     |
| Total number of positively charged residues (Arg + Lys) | 69                                                                                       | 70                                                     | 61                                                     | 70                                                     | 68                                                     | 61                                                     | 68                                                     | 71                                                     |
| Instability index                                       | 36.62                                                                                    | 38.77                                                  | 37.22                                                  | 35.79                                                  | 34.96                                                  | 39.57                                                  | 36.35                                                  | 34.77                                                  |
| Aliphatic index                                         | 84.56                                                                                    | 85.36                                                  | 89.02                                                  | 90.84                                                  | 89.55                                                  | 94.09                                                  | 90.41                                                  | 85.47                                                  |
| Grand average of hydropathicity                         | -0.319                                                                                   | -0.348                                                 | -0.229                                                 | -0.166                                                 | -0.167                                                 | -0.075                                                 | -0.156                                                 | -0.258                                                 |
| Formula                                                 | C <sub>2636</sub> H <sub>4096</sub> N <sub>6</sub><br>90O <sub>737</sub> S <sub>25</sub> | C <sub>2746</sub> H <sub>4287</sub> N <sub>741</sub> O | C <sub>2631</sub> H <sub>4118</sub> N <sub>708</sub> O | C <sub>2666</sub> H <sub>4184</sub> N <sub>698</sub> O | C <sub>2649</sub> H <sub>4164</sub> N <sub>692</sub> O | C <sub>2601</sub> H <sub>4097</sub> N <sub>693</sub> O | C <sub>2749</sub> H <sub>4261</sub> N <sub>695</sub> O | C <sub>2633</sub> H <sub>4132</sub> N <sub>696</sub> O |
|                                                         |                                                                                          | 777S <sub>20</sub>                                     | 749S <sub>19</sub>                                     | 738S <sub>21</sub>                                     | 739S <sub>23</sub>                                     | 724S <sub>22</sub>                                     | 756S <sub>19</sub>                                     | 745S <sub>23</sub>                                     |

**Table S4** Signal peptides of *G. molesta* P450s

| Gene name            | Max C         | Max Y         | Max S         | Mean S          | Mean D          | Cleavage site | Signal peptide |
|----------------------|---------------|---------------|---------------|-----------------|-----------------|---------------|----------------|
| <i>CYP6B74</i>       | 18<br>(0.627) | 18<br>(0.775) | 11<br>(0.984) | 1-17<br>(0.953) | 1-17<br>(0.872) | 17-18         | YES            |
| <i>CYP6AB1</i><br>12 | 23<br>(0.214) | 23<br>(0.228) | 12<br>(0.431) | 1-22<br>(0.253) | 1-22<br>(0.238) | -             | NO             |
| <i>CYP6AB1</i><br>13 | 20<br>(0.253) | 20<br>(0.296) | 12<br>(0.461) | 1-19<br>(0.336) | 1-19<br>(0.312) | -             | NO             |
| <i>CYP6AB1</i><br>14 | 22<br>(0.165) | 22<br>(0.224) | 13<br>(0.548) | 1-21<br>(0.319) | 1-21<br>(0.262) | -             | NO             |
| <i>CYP6AB1</i><br>15 | 22<br>(0.199) | 13<br>(0.242) | 1 (0.639)     | 1-12<br>(0.401) | 1-12<br>(0.306) | -             | NO             |
| <i>CYP6AB1</i><br>16 | 26<br>(0.146) | 26<br>(0.340) | 13<br>(0.928) | 1-25<br>(0.761) | 1-25<br>(0.567) | 25-26         | YES            |
| <i>CYP6AB1</i><br>17 | 33<br>(0.183) | 23<br>(0.333) | 15<br>(0.863) | 1-22<br>(0.728) | 1-22<br>(0.547) | 22-23         | YES            |
| <i>CYP6AN3</i><br>5  | 21<br>(0.173) | 21<br>(0.336) | 6 (0.737)     | 1-20<br>(0.647) | 1-20<br>(0.504) | 20-21         | YES            |

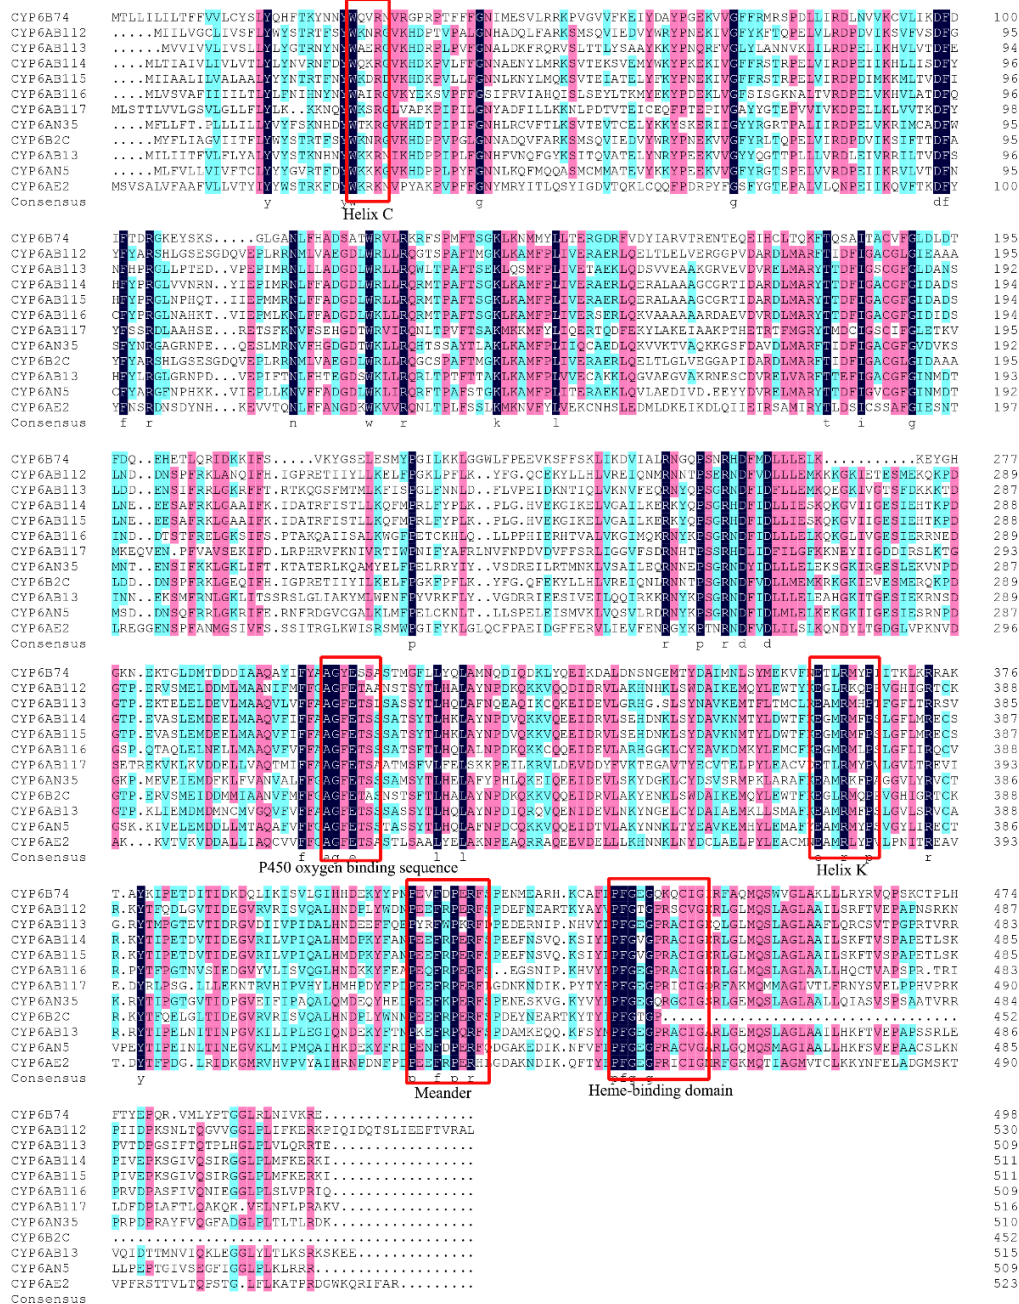

**Figure S1 Multiple-sequence alignment of *G. molesta* cytochrome P450s.**

Note: The following species (with GenBank accession numbers) were examined: *C. pomonella* (AXP17138.1 *CYP6B2C*), *M. sexta* (ADE05585.1 *CYP6AB13*, ADE05584.1 *CYP6AN5*), *Bombyx mori* (NP\_001077080.1 *CYP6AE2*). The newly identified 8 genes belong to the cytochrome P450 family. The conserved region of cytochrome P450s is marked, such as ‘WXXXR’, ‘EXXRXX’, ‘PXXFXPXX’, ‘FXXGXXXCXG’ and ‘A/GGXDETT/S’.
